# Supplementary material for: Capsular Polysaccharide Interferes with Biofilm Formation by Pasteurella multocida Serogroup A
Source: PubMed Central journal article supplement (PMC5698555; doi:10.1128/mbio.01843-17), 2017-11-21
Supplement: mbo006173600st1.pdf [file mbo006173600st1.pdf]

**Table S1. Laboratory strains and clinical isolates used in this study.** Isolates included commonly used laboratory strains and recent clinical isolates.

| Strain                                                                 | Common name                | Serotype <sup>a</sup> /<br>phenotype | Source                                   |
|------------------------------------------------------------------------|----------------------------|--------------------------------------|------------------------------------------|
| <i>P. multocida</i> subsp. <i>gallicida</i> P1059                      | WT P1059                   | A:3/<br>encapsulated                 | National Animal Disease<br>Center (NADC) |
| <i>P. multocida</i> subsp. <i>gallicida</i> P1059 $\Delta$ <i>hyaE</i> | P1059 $\Delta$ <i>hyaE</i> | Non- encapsulated                    | This study                               |
| <i>P. multocida</i> subsp. <i>multocida</i> P1062                      | WT P1062                   | A:3/<br>encapsulated                 | NADC                                     |
| <i>P. multocida</i> subsp. <i>multocida</i> P1062 $\Delta$ <i>hyaE</i> | P1062 $\Delta$ <i>hyaE</i> | Non- encapsulated                    | This study                               |
| <i>P. multocida</i> X73                                                | WT X73                     | A:1/<br>encapsulated                 | NADC                                     |
| <i>P. multocida</i> X73 $\Delta$ <i>hyaD</i>                           | X73 $\Delta$ <i>hyaD</i>   | Non- encapsulated                    | This study                               |
| <i>Pasteurella multocida</i> C0513                                     | WT C0513                   | A/<br>encapsulated                   | Experimental calf infection <sup>3</sup> |

|                                       |          |                       |            |
|---------------------------------------|----------|-----------------------|------------|
| <i>Pasteurella multocida</i> C0513-P5 | C0513-P5 | A (capsule-deficient) | This study |
|---------------------------------------|----------|-----------------------|------------|

| <b>Clinical Isolates</b> | <b>Location of Origin</b>                                                               | <b>Host species and infection site</b> | <b>Serogroup or Serotype</b> |
|--------------------------|-----------------------------------------------------------------------------------------|----------------------------------------|------------------------------|
| 756                      | Virginia Department of Agriculture,<br>Division of Animal and Food Industry<br>Services | Chicken heart, spleen, bone marrow     | F:9                          |
| 765                      | Virginia Department of Agriculture,<br>Division of Animal and Food Industry<br>Services | Turkey liver, spleen, lung             | A                            |
| 704                      | Virginia Department of Agriculture,<br>Division of Animal and Food Industry<br>Services | Chicken wattle                         | A:8                          |

|     |                                                                                         |                                    |       |
|-----|-----------------------------------------------------------------------------------------|------------------------------------|-------|
| 801 | Virginia Department of Agriculture,<br>Division of Animal and Food Industry<br>Services | Chicken heart, spleen, bone marrow | A     |
| 785 | Virginia Department of Agriculture,<br>Division of Animal and Food Industry<br>Services | Chicken liver, spleen, heart       | F:9   |
| 775 | Virginia Department of Agriculture,<br>Division of Animal and Food Industry<br>Services | Turkey lung                        | A:3,4 |
| 741 | Virginia Department of Agriculture,<br>Division of Animal and Food Industry<br>Services | Chicken bone marrow                | A:3,4 |
| 742 | Virginia Department of Agriculture,<br>Division of Animal and Food Industry<br>Services | Chicken heart, spleen, bone marrow | A:1   |

|          |                                                                                         |                                    |       |
|----------|-----------------------------------------------------------------------------------------|------------------------------------|-------|
| 745      | Virginia Department of Agriculture,<br>Division of Animal and Food Industry<br>Services | Chicken heart, spleen, bone marrow | A:3,4 |
| 747      | Virginia Department of Agriculture,<br>Division of Animal and Food Industry<br>Services | Chicken heart, spleen              | A     |
| 232      | Oklahoma State University                                                               | Bovine lung                        | A     |
| 9877     | Oklahoma State University                                                               | Bovine lung                        | A     |
| 96031276 | Oklahoma State University                                                               | Bovine lung                        | A     |
| 00111378 | Oklahoma State University                                                               | Bovine nasal                       | A     |
| 96020298 | Oklahoma State University                                                               | Bovine lung                        | A     |
| 134      | Oklahoma State University                                                               | Bovine lung                        | A     |
| 95101538 | Oklahoma State University                                                               | Bovine lung                        | A     |

|               |                                                     |                                     |   |
|---------------|-----------------------------------------------------|-------------------------------------|---|
| 13-1367       | Virginia-Maryland College of Veterinary<br>Medicine | Dog ear                             | A |
| H1            | Virginia-Maryland College of Veterinary<br>Medicine | Cat mouth                           | A |
| 12B-<br>21481 | University of Wyoming                               | Bovine liver, lung, small intestine | A |
|               | Virginia-Maryland College of Veterinary<br>Medicine | Porcine lung                        | D |
| Pm70          | ATCC (BAA-1909)                                     | Chicken                             | F |
| Pm70          | Dr. Kapur, Pennsylvania State University            | Chicken                             | F |
| 989           | Virginia-Maryland College of Veterinary<br>Medicine | Turkey                              |   |

---

<sup>a</sup>A standard system for designating serotypes of *P. multocida* was established using a combination of capsular serogroup typing and LPS serovar typing systems (86).
