# Supplementary material for: Capsular Polysaccharide Interferes with Biofilm Formation by Pasteurella multocida Serogroup A
Source: PubMed Central journal article supplement (PMC5698555; doi:10.1128/mbio.01843-17), 2017-11-21
Supplement: mbo006173600st2.pdf [file mbo006173600st2.pdf]

**Table S2. Primers used for quantitative reverse transcriptase-polymerase chain reaction (qRT-PCR) analysis.**

| <u>Gene description</u> | <u>Gene<sup>a</sup></u> | <u>Forward primer sequence</u>        | <u>Reverse primer sequence</u>        |
|-------------------------|-------------------------|---------------------------------------|---------------------------------------|
| Control                 | <i>gyrB</i>             | 5'-<br>TATGAGTGGCTTGGCGTTA<br>G-3'    | 5'-<br>ACACCGCTTCTGGATAAT<br>AGC-3'   |
| Glycogen synthesis      | <i>malQ</i>             | 5'-<br>TGAACAGGCGACGAAGTA<br>TG-3'    | 5'-<br>CCGACGAGAAGATGAGCT<br>ATAAG-3' |
| Glycogen synthesis      | <i>glgB</i>             | 5'-<br>CAGTAAAGACGGAGAGCG<br>AATTA-3' | 5'-<br>CCACATAGTTACCCGCCA<br>TATT-3'  |
| Glycogen synthesis      | <i>glgX</i>             | 5'-<br>AGCGATGTTTGCCTAGA<br>A-3'      | 5'-<br>TCGATACCCGCTTGATGT<br>AATG-3'  |

|                           |             |                                      |                                      |
|---------------------------|-------------|--------------------------------------|--------------------------------------|
| <b>Glycogen synthesis</b> | <i>glgC</i> | 5'-<br>GGGAACCCAGTACAAACC<br>TATC-3' | 5'-<br>TAATCACGCAACCACCAG<br>AA-3'   |
| <b>Glycogen synthesis</b> | <i>glgA</i> | 5'-<br>ACATGCTTGCTCGGAGTTA<br>TAC-3' | 5'-<br>GGATACGCCGGTAAGACA<br>ATAC-3' |
| <b>Glycogen synthesis</b> | <i>glgP</i> | 5'-<br>CGGAATTTATCCGTCGTGT<br>CT-3'  | 5'-<br>GCCACGCCATTCACTTTAT<br>TC-3'  |

<sup>a</sup>Genes selected were those present in the putative glycogen synthesis locus of *P. multocida*.
